# Supplementary material
Source: PubMed Central journal article supplement (PMC7964410)
Supplement: 2675_tables.pdf [file 2675_tables.pdf]

**On-line Table 1: TICs of sinonasal diseases**

|                     | n  | Overall TIC |        |        |        |        | TIC Mapping (%) |         |         |         |        |
|---------------------|----|-------------|--------|--------|--------|--------|-----------------|---------|---------|---------|--------|
|                     |    | Type 1      | Type 2 | Type 3 | Type 4 | Type 5 | Type 1          | Type 2  | Type 3  | Type 4  | Type 5 |
| Inflammatory lesion | 12 | 0           | 11     | 1      | 0      | 0      | 13 ± 10         | 56 ± 16 | 19 ± 12 | 8 ± 6   | 4 ± 5  |
| Rhinosinusitis      | 5  | 0           | 5      | 0      | 0      | 0      | 13 ± 11         | 60 ± 8  | 16 ± 11 | 7 ± 5   | 4 ± 4  |
| Polyp               | 4  | 0           | 3      | 1      | 0      | 0      | 11 ± 14         | 55 ± 26 | 25 ± 18 | 8 ± 7   | 1 ± 1  |
| Fungus              | 3  | 0           | 3      | 0      | 0      | 0      | 15 ± 11         | 52 ± 17 | 15 ± 4  | 10 ± 6  | 8 ± 5  |
| Benign lesion       | 9  | 0           | 8      | 1      | 0      | 0      | 21 ± 31         | 52 ± 26 | 24 ± 25 | 2 ± 3   | 1 ± 3  |
| Papilloma           | 3  | 0           | 3      | 0      | 0      | 0      | 1 ± 0           | 79 ± 5  | 17 ± 3  | 4 ± 4   | 0 ± 0  |
| Hematoma            | 3  | 0           | 3      | 0      | 0      | 0      | 61 ± 9          | 29 ± 6  | 5 ± 1   | 1 ± 0   | 3 ± 5  |
| Hemangioma          | 2  | 0           | 1      | 1      | 0      | 0      | 0 ± 0           | 42 ± 37 | 57 ± 37 | 1 ± 0   | 0 ± 0  |
| Angiofibroma        | 1  | 0           | 1      | 0      | 0      | 0      | 0               | 62      | 36      | 2       | 0      |
| Malignant tumor     | 23 | 0           | 9      | 13     | 1      | 0      | 4 ± 7           | 41 ± 20 | 35 ± 14 | 19 ± 15 | 2 ± 3  |
| SCC                 | 10 | 0           | 3      | 7      | 0      | 0      | 5 ± 7           | 40 ± 18 | 34 ± 11 | 19 ± 12 | 3 ± 3  |
| Lymphoma            | 5  | 0           | 2      | 3      | 0      | 0      | 0 ± 0           | 38 ± 19 | 46 ± 15 | 16 ± 4  | 0 ± 0  |
| UDC                 | 2  | 0           | 1      | 1      | 0      | 0      | 6 ± 2           | 45 ± 11 | 27 ± 5  | 19 ± 3  | 3 ± 1  |
| Melanoma            | 1  | 0           | 1      | 0      | 0      | 0      | 24              | 46      | 20      | 5       | 5      |
| Neuroblastoma       | 1  | 0           | 0      | 1      | 0      | 0      | 0               | 28      | 31      | 41      | 0      |
| RMS                 | 1  | 0           | 1      | 0      | 0      | 0      | 0               | 96      | 4       | 0       | 0      |
| ACC                 | 2  | 0           | 1      | 1      | 0      | 0      | 1 ± 0           | 49 ± 11 | 45 ± 8  | 5 ± 4   | 0 ± 0  |
| RCC                 | 1  | 0           | 0      | 0      | 1      | 0      | 0               | 5       | 31      | 62      | 1      |

  

| P values for TIC mapping |                    |                    |                    |                    |                    |
|--------------------------|--------------------|--------------------|--------------------|--------------------|--------------------|
|                          | Type 1             | Type 2             | Type 3             | Type 4             | Type 5             |
| Mann-Whitney U-test      |                    |                    |                    |                    |                    |
| I vs B                   | .3742              | .9151              | .9433              | .0069 <sup>a</sup> | .0043 <sup>a</sup> |
| B vs M                   | .9331              | .3675              | .0263 <sup>a</sup> | .0007 <sup>a</sup> | .0768              |
| I vs M                   | .0054 <sup>a</sup> | .0165 <sup>a</sup> | .0028 <sup>a</sup> | .0239 <sup>a</sup> | .0414 <sup>a</sup> |
| I + B vs M               | .0538              | .0335 <sup>a</sup> | .0011 <sup>a</sup> | .0006 <sup>a</sup> | .6543              |

**Note:**—Polyp, nasal polyp; Fungus, fungal rhinosinusitis; Papilloma, inverted papilloma; Hematoma, organized hematoma, Angiofibroma, juvenile angiofibroma; Melanoma, malignant melanoma; Neuroblastoma, olfactory neuroblastoma; UDC, undifferentiated carcinoma; RMS, pleomorphic rhabdomyocarcinoma; ACC, acinic-cell carcinoma; REC, metastatic renal cell carcinoma.

**On-line Table 2: ADCs of sinonasal diseases**

|                     | n  | Overall ADC<br>(×10 <sup>-3</sup> mm <sup>2</sup> /s) | ADC Mapping (%) |         |              |         |                      |
|---------------------|----|-------------------------------------------------------|-----------------|---------|--------------|---------|----------------------|
|                     |    |                                                       | Extremely low   | Low     | Intermediate | High    | Extremely low + high |
| Inflammatory lesion | 12 | 1.48 ± 0.35                                           | 11 ± 12         | 22 ± 12 | 35 ± 12      | 32 ± 21 | 33 ± 22              |
| Rhinosinusitis      | 5  | 1.66 ± 0.38                                           | 6 ± 5           | 20 ± 18 | 29 ± 6       | 45 ± 26 | 26 ± 22              |
| Polyp               | 4  | 1.50 ± 0.17                                           | 8 ± 10          | 19 ± 7  | 44 ± 12      | 29 ± 6  | 27 ± 16              |
| Fungus              | 3  | 1.16 ± 0.35                                           | 22 ± 19         | 29 ± 6  | 34 ± 14      | 15 ± 14 | 51 ± 25              |
| Benign lesion       | 9  | 1.45 ± 0.30                                           | 7 ± 10          | 20 ± 17 | 49 ± 16      | 24 ± 14 | 27 ± 27              |
| Papilloma           | 3  | 1.58 ± 0.09                                           | 0 ± 0           | 13 ± 5  | 60 ± 5       | 26 ± 10 | 14 ± 5               |
| Hematoma            | 3  | 1.08 ± 0.13                                           | 19 ± 6          | 41 ± 9  | 30 ± 9       | 10 ± 5  | 61 ± 13              |
| Hemangioma          | 2  | 1.72 ± 0.06                                           | 1 ± 1           | 5 ± 5   | 55 ± 2       | 40 ± 8  | 5 ± 6                |
| Angiofibroma        | 1  | 1.66                                                  | 0               | 7       | 63           | 30      | 7                    |
| Malignant tumor     | 23 | 0.83 ± 0.26                                           | 32 ± 28         | 53 ± 22 | 13 ± 14      | 3 ± 6   | 85 ± 17              |
| SCC                 | 10 | 0.83 ± 0.17                                           | 22 ± 20         | 66 ± 20 | 11 ± 11      | 1 ± 2   | 88 ± 8               |
| Lymphoma            | 5  | 0.55 ± 0.10                                           | 70 ± 17         | 28 ± 15 | 1 ± 2        | 0 ± 1   | 99 ± 2               |
| UDC                 | 2  | 0.65 ± 0.04                                           | 53 ± 8          | 39 ± 5  | 6 ± 3        | 1 ± 1   | 92 ± 3               |
| Melanoma            | 1  | 1.38                                                  | 12              | 38      | 23           | 27      | 50                   |
| Neuroblastoma       | 1  | 0.95                                                  | 4               | 71      | 25           | 0       | 75                   |
| RMS                 | 1  | 1.08                                                  | 3               | 66      | 30           | 1       | 69                   |
| ACC                 | 2  | 1.08 ± 0.37                                           | 14 ± 13         | 56 ± 14 | 24 ± 19      | 7 ± 8   | 70 ± 27              |
| RCC                 | 1  | 1.17                                                  | 7               | 49      | 38           | 7       | 55                   |

  

| Mann-Whitney U test |                   | P values      |                   |                   |                   |                   |
|---------------------|-------------------|---------------|-------------------|-------------------|-------------------|-------------------|
| I vs B              | 0.9716            | 0.3018        | 0.6189            | <b>0.0466</b>     | 0.5224            | 0.3938            |
| B vs M              | <b>0.0002</b>     | <b>0.0024</b> | <b>0.0011</b>     | <b>0.0001</b>     | <b>&lt;0.0001</b> | <b>&lt;0.0001</b> |
| I vs M              | <b>&lt;0.0001</b> | <b>0.0250</b> | <b>0.0002</b>     | <b>0.0004</b>     | <b>&lt;0.0001</b> | <b>&lt;0.0001</b> |
| I + B vs M          | <b>&lt;0.0001</b> | <b>0.0013</b> | <b>&lt;0.0001</b> | <b>&lt;0.0001</b> | <b>&lt;0.0001</b> | <b>&lt;0.0001</b> |

**Note:**—Polyp, nasal polyp; Fungus, fungal rhinosinusitis; Papilloma, inverted papilloma; Hematoma, organized hematoma, Angiofibroma, juvenile angiofibroma; Melanoma, malignant melanoma; Neuroblastoma, olfactory neuroblastoma; VOCA, undifferentiated carcinoma; RMS, pleomorphic rhabdomyocarcinoma; ACC, acinic-cell carcinoma; REC, metastatic renal cell carcinoma. Bold P values indicate significant (P < 0.05) difference between inflammatory lesions (I), benign lesions (B), and malignant tumors (M).
